# Supplementary material for: In situ conversion of metal (Ni, Co or Fe) foams into metal sulfide (Ni3S2, Co9S8 or FeS) foams with surface grown N-doped carbon nanotube arrays as efficient superaerophobic electrocatalysts for overall water splitting
Source: Royal Society of Chemistry journal article supplement (doi:10.1039/d0ta02337j), 2020-01-01
Supplement: d0ta02337j1.pdf [file d0ta02337j1.pdf]

## Supporting Information

### ***In-situ* conversion of metal (Ni, Co or Fe) foams into metal sulfide (Ni<sub>3</sub>S<sub>2</sub>, Co<sub>9</sub>S<sub>8</sub> or FeS) foams with surface grown N-doped carbon nanotube arrays as efficient superaerophobic electrocatalysts for overall water splitting**

*Mingrui Guo, Abdul Qayum, Shun Dong, Xiuling Jiao, Dairong Chen\* and Ting Wang\**

School of Chemistry & Chemical Engineering, National Engineering Research Center for Colloidal Materials, Shandong University  
E-mail: t54wang@sdu.edu.cn; cdr@sdu.edu.cn

#### **1. Materials**

Nickel (II) nitrate hexahydrate (Ni(NO<sub>3</sub>)<sub>2</sub>·6H<sub>2</sub>O), ferric nitrate (Fe(NO<sub>3</sub>)<sub>3</sub>·9H<sub>2</sub>O), urea, and potassium hydroxide (KOH) were purchased from Sinopharm Chemical Reagent Co. Ltd. Thiourea was purchased from Tianjin Guangcheng Chemical Factory. Ni foams, Fe foams, Co foams with a thickness of 1.6 mm were purchased from Kunshan guangjiayuan electronic material Co. Ltd. Pt/C (20 wt % of Pt) was purchased from Alfa Aesar (China). All the reagents were of analytical grade and used as-received without further purification. Ultrapure water (18.25 MΩ) were used in all experiments.

#### **2. Characterization**

Powder X-ray diffraction (XRD) patterns were collected on a Rigaku D/Max 2200PC diffractometer with a graphite monochromator and Cu K<sub>α</sub> radiation (λ= 0.15418 nm). Morphology and microstructure of the products were characterized by a transmission electron microscope (TEM, JEOL JEM-1011) with an accelerating voltage of 100 kV, a field emission-scanning electron microscope (FE-SEM, SU8010), and a high-resolution transmission electron microscope (HR-TEM, JEOL JEM-2100) with an accelerating voltage of 200 kV. The scanning transmission electron microscope (HAADF-STEM) images and the corresponding EDS mapping images were collected by Talos F200X operated at 200 kV. The X-ray photoelectron spectra (XPS) were recorded on a Thermo SCIENTIFIC ESCALAB 250Xi, and the Al K<sub>α</sub> line was used as the excitation source. The thermogravimetric analysis (TGA) were operated on an STA449F3 Jupiter (NETZSCH) analyzer in air with a heating rate of 10 °C min<sup>-1</sup>. The feature of the solid-liquid contact interface between catalysts and water were characterized by using a Kruss DSA10 optical contact angle system. The hydrogen and oxygen were collected and analyzed on gas chromatography (3420A, BeiFenRuiLi Co., Ltd).

#### **3. Synthesis**

##### **Synthesis of the NSF and the NSF/CNT.**

Ni foams were cleaned through sonication consecutively in concentrated HCl solution (3 M) and acetone for 3 times to remove the NiO<sub>x</sub> layer on the surface, then the foams were washed with DI water and ethanol for 3 times. In a typical synthesis process, the pre-cleaned nickel foams were placed in a ceramic boat located at the center of a tube furnace, and an alumina boat containing 8 g thiourea was placed in the entrance of the furnace as the sources of carbon, sulfur and nitrogen. Before the furnace was heated, Ar (99.99 % in purity) were introduced into the tube furnace system with a flow rate of 100 sccm for 30 min to drive the air out from the tube. Subsequently, the tube was heated up to 900 °C with a heating speed of 10 °C min<sup>-1</sup> and kept at that temperature for 1 h. The obtained NSF/CNT were allowed to be cooled to room temperature naturally. For NSF preparation, the tube was heated up to 600 °C instead of 900 °C with a heating speed of 10 °C min<sup>-1</sup> and kept at that temperature for 1 h.

#### **Synthesis of the FeSF and the FeSF/CNT .**

Fe foams were used to replace Ni foams in the above reaction system to prepare the FeSF/CNT. The tube furnace was heated up to 1000 °C with a heating speed of 10 °C min<sup>-1</sup> and kept at that temperature for 2 h. The obtained FeSF/CNT were allowed to be cooled to room temperature naturally. For FeSF preparation, the tube furnace was heated up to 600 °C instead of 1000 °C with a heating speed of 10 °C min<sup>-1</sup> and kept at that temperature for 1 h.

#### **Synthesis of CoSF and the CoSF/CNT.**

Co foams were used to replace Ni foam in the above reaction system to prepare the CoSF/CNT. The tube furnace was heated up to 900 °C with a heating speed of 10 °C min<sup>-1</sup> and kept at that temperature for 1 h. The obtained CoSF/CNT were allowed to be cooled to room temperature naturally. For CoSF preparation, the tube was heated up to 600 °C and kept at that temperature for 1 h.

#### **Synthesis of NiFe-LDH on nickel foams.**

NiFe-LDH were synthesized using a hydrothermal method.<sup>1</sup> Ni(NO<sub>3</sub>)<sub>2</sub>·6H<sub>2</sub>O (0.5 mmol), 0.5 mmol of Fe(NO<sub>3</sub>)<sub>3</sub>·9H<sub>2</sub>O, and 5 mmol of urea were dissolved in 36 mL deionized water and agitated for 0.5 h, the solution was transferred to a 50 mL autoclave with a piece of Ni foam inside. Then, the autoclave was heated up to 120 °C and kept at that temperature for 12 h. After the reaction, the obtained Ni foam with surface coating NiFe-LDH nanosheets was washed with deionized water and absolute ethanol for three times and vacuum-dried at 60 °C for 8 h.

#### **4. Electrochemical measurements and the adhesive force estimated by the size of the gas bubbles**

Electrochemical measurements are performed with a CHI 760E electrochemical analyzer (CH Instruments, Inc., Shanghai) in a standard three-electrode system, using the produced

products as the working electrode, a graphite rod and a Hg/HgO working as the counter electrode and the reference electrode, respectively. All tests were carried out in N<sub>2</sub>-saturated 1 M KOH at room temperature. All the potential values measured were calibrated with respect to reversible hydrogen electrode (RHE) using the Nernst equation:  $E_{vs\ RHE} = E_{vs\ Hg/HgO} + 0.095 + 0.059pH$ . The reported current density is based on the geometrical area of the working electrode. Linear sweep voltammetry (LSV) data was measured with a scan rate of 5 mV s<sup>-1</sup>. The long-term stability tests were performed using the constant current electrolysis method (J=100 mA). To accomplish the full water electrolysis, NSF/CNT were also used as both anode and cathode in a N<sub>2</sub>-saturated 1.0 M KOH electrolyte (two-electrode configuration). To compare the performance of the NSF/CNT electrodes with the state-of-the-art catalysts, Pt/C powders were loaded on a nickel foam with a catalyst loading of 10 mg cm<sup>-2</sup> for HER and NiFe-LDH on nickel foams was used for OER measurements. Electrochemical impedance spectroscopy (EIS) were made (in the frequency range of 100 kHz to 0.1 Hz) in 1 M KOH solution. The ECSA was estimated from the doublelayer capacitance (C<sub>dl</sub>) charging curve using cyclic voltammetry in a small potential range of 0.1-0.2 V vs. Hg/HgO and the scan rates were 1-10 mV s<sup>-1</sup>. The long-term stability tests were performed using the constant potential electrolysis method. The linear sweep voltammetry measurements were all 85% iR-compensated.

The calculation of turn over frequency (TOF).

$$TOF = \frac{j \times S}{N \times F \times n}$$

In the above equation, j stands for the current density (A cm<sup>2</sup>), S is the electrode area (cm<sup>2</sup>), N is the number of electrons transferred to evolve a molecule of product (for H<sub>2</sub>, it is 2 and for O<sub>2</sub>, it is 4), F is the Faraday constant (96485 C mol<sup>-1</sup>) and n is the number of active metal atoms in the catalyst material (mol).

The bubble adhesion on a rough surface can be calculated by the following equation:<sup>2</sup>

$$F = f_s * F_a \text{ (Equation 1)}$$

The gas bubble adhesion on an aerophobic surface in electrolyte is similar to the water droplets on hydrophobic surfaces, where the Cassie-Baxter equation can be used to measure the aerophobic properties:<sup>3</sup>

$$\cos \alpha^* = -1 + f_s (\cos \alpha + 1) \text{ (Equation 2)}$$

In this equation,  $\alpha$  is the apparent contact angle (CA),  $\alpha^*$  is the apparent CA on the rough solid surface, and  $f_s$  is the solid fraction of the contact area. Using this equation, the solid fraction of the contact area  $f_s$  can be calculated.

As shown in Equation 1, the adhesive force ( $F_a$ ) of a bubble on an ideal solid surface, which is related to surface tension ( $\gamma$ ), bubble radius ( $r$ ), and contact angle ( $\alpha$ ) can be calculated using the following equation (Equation 3).<sup>4</sup>

$$F_a = \gamma 2\pi(r \sin\alpha) \sin \alpha \quad (\text{Equation 3})$$

For a two-dimensional nanosheets coated electrode such as the NiFe-LDH, one-dimensional edge area are  $S=15\text{nm} \times 700\text{nm}=0.0105\mu\text{m}^2$ . Estimated from the SEM images, there are approximately 27 pieces of nanosheets on the surface ( $1\mu\text{m} \times 1\mu\text{m}$ ), and the solid part of the contact area with the gas bubbles are these one-dimensional edges of the LDH nanosheets, which can be calculated as  $f_s=(1/10^{-6}) \times 27 \times 0.0105 \approx 0.3$  (30 %).

For the NSF/CNT, the solid contact to the gas bubbles are zero-dimensional tip-points of the nanotubes,  $S_2=3.14 \times 0.35 \times 0.35=0.38\mu\text{m}^2$ . There are approximately 20 CNTs on the surface area of NSF/CNT electrode ( $20\mu\text{m} \times 20\mu\text{m}$ ), the solid part of the contact area to the gas bubbles are extremely low,  $f_s=1/(400 \times 10^{-6}) \times 20 \times 0.38 \times 10^{-6} \approx 0.02$  (2 %).

#### Supplementary Figures:

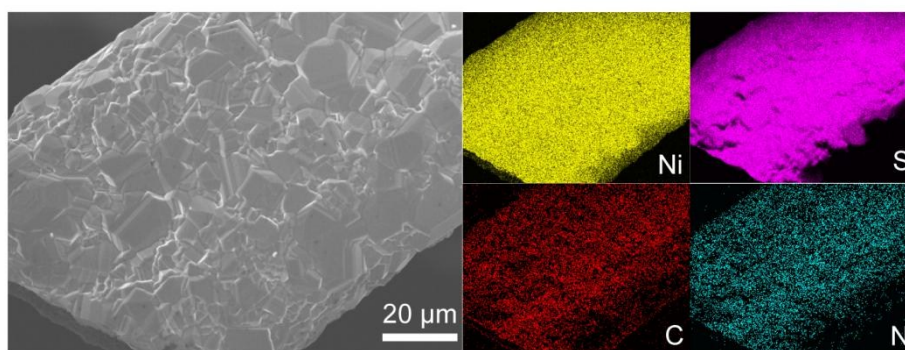

**Figure S1.** SEM and the corresponding elemental mapping images of the NSF obtained at 600 °C.

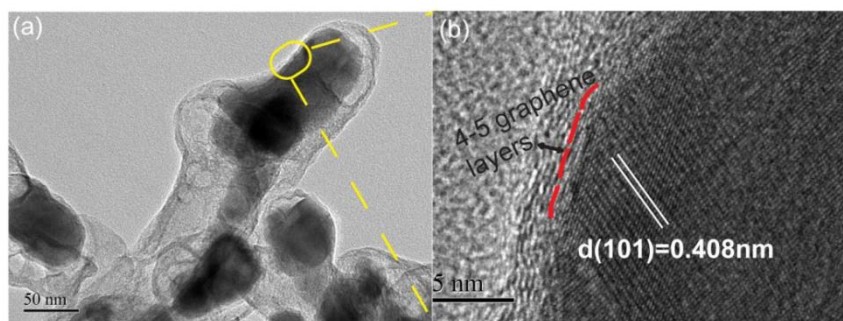

**Figure S2.** (a) TEM and (b) HRTEM images showing the tips of the carbon nanotubes in the NSF/CNT, the HRTEM shows the surfaces of the tips are covered by graphene layers and the fringes of the crystals are in corresponding to the  $\text{Ni}_3\text{S}_2$  lattice.

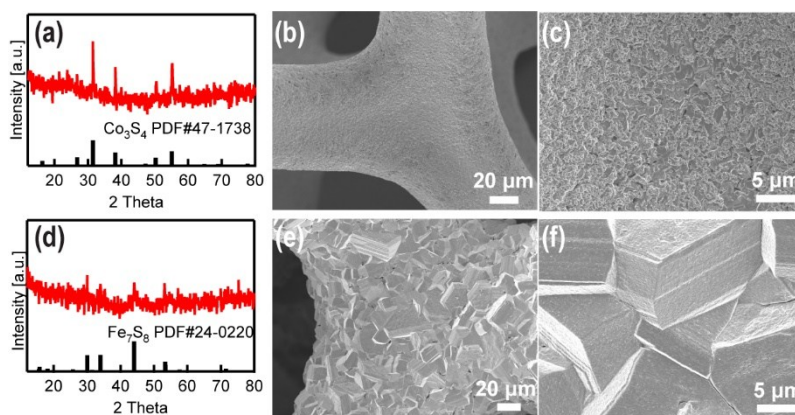

**Figure S3.** (a) XRD pattern, (b) low-resolution SEM and (c) high-resolution SEM images of the  $\text{Co}_3\text{S}_4$  foams obtained at 600 °C; (d) XRD pattern, (e) low-resolution SEM and (f) high-resolution SEM images of the  $\text{Fe}_7\text{S}_8$  foams obtained at 600 °C.

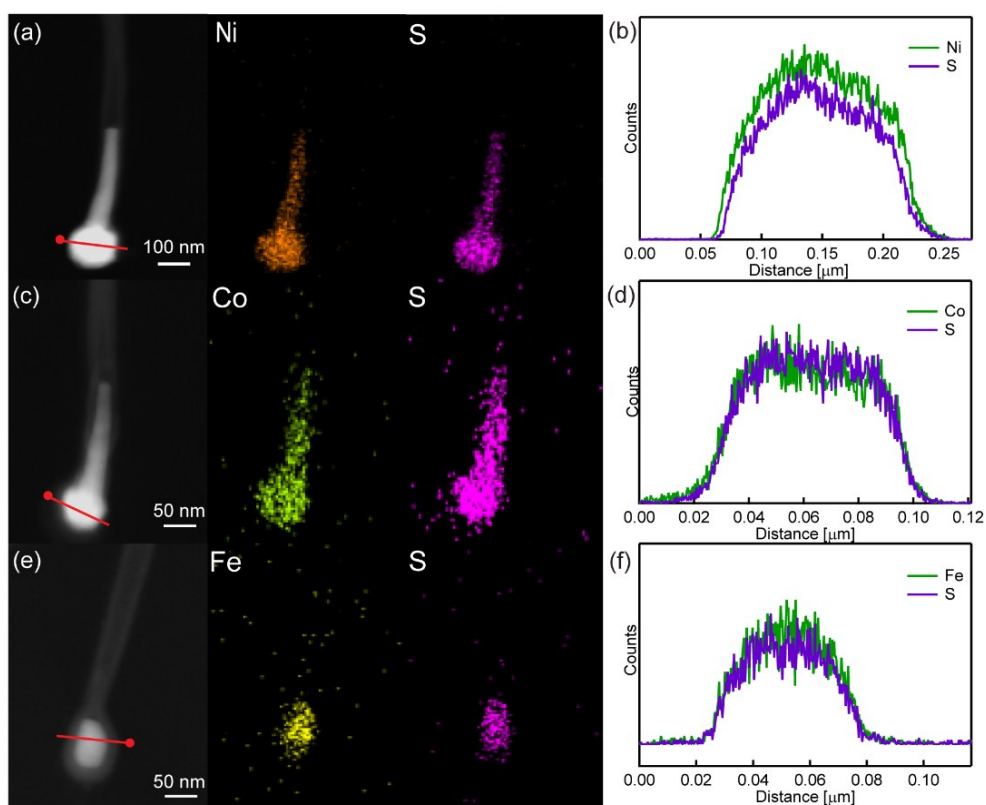

**Figure S4.** (a, c, e) STEM and the corresponding elemental mapping images of one tip of the carbon nanotubes catalyzed by nickel sulfide, cobalt sulfide and iron sulfide, respectively. (b, d, f) Line-scan STEM-EDS through the red line in (a, c, e) showing the distribution of the metal and sulfur elements.

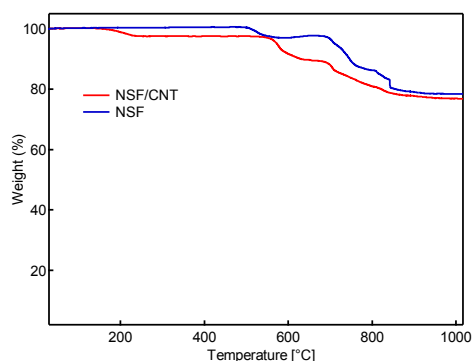

**Figure S5.** Thermogravimetric analysis (TGA) results measured in air in the temperature range from 25 to 1000 °C for NSF/CNT and NSF.

For NSF, the oxidation of the carbon coating on the sample surface occurs before 700 °C. The oxidation of NiS and their decomposition between 700-1000 °C resulted in a weight loss of ~19%. For NSF/CNT, the initial weight loss below 230 °C can be attributed to the removal of adsorbed water; the second step is before 700 °C with a weight loss of 8.6% is caused by the oxidation of surface carbon nanotubes. The weight loss of ~12% between 700-1000 °C can be attributed to the decomposition and the oxidation of  $\text{Ni}_3\text{S}_2$ .

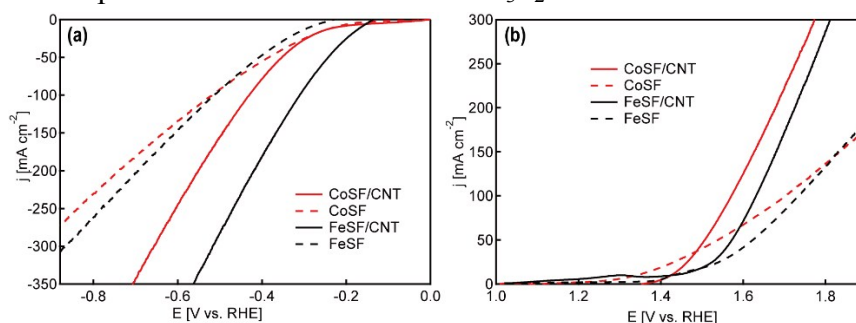

**Figure S6.** (a) LSV curves showing the enhancement of the HER performance after carbon nanotube coating. (b) LSV curves showing the enhancement of the OER performance after carbon nanotube coating.

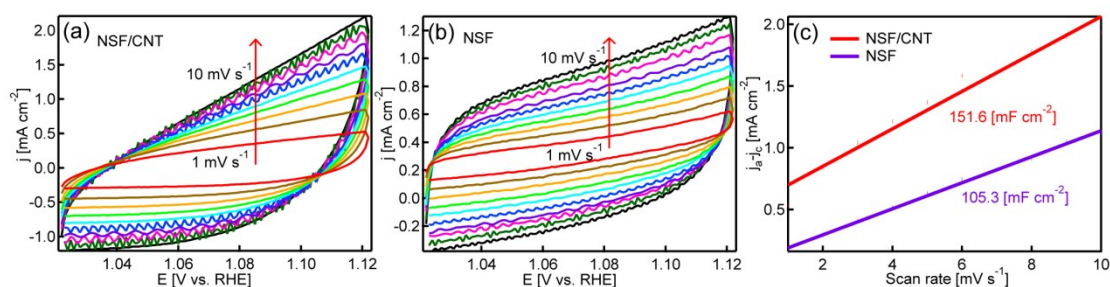

**Figure S7.** The CVs of the (a)NSF/CNT and (b) NSF catalysts with various scan rates under the non-faradic range versus RHE. (c) ECSA of the NSF/CNT and NSF.

**Figure S8.** EIS spectra of the NSF/CNT compared with the NSF. (a) Fitted parameters from the EIS plots. (b) The equivalent circuit used for fitting the EIS results.

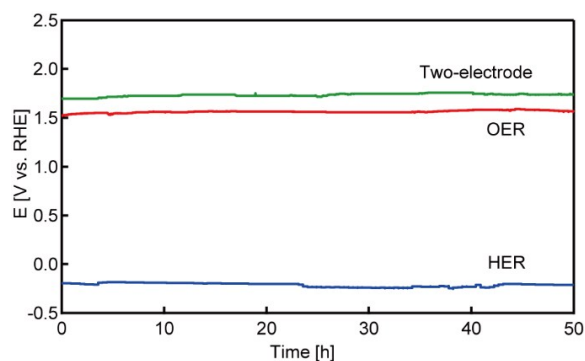

**Figure S9.** Long-term stability tests of the NSF/CNT as the working electrode for HER (blue line) and OER (red line) at a current of 100 mA. The green line shows the potential stability when using the NSF/CNT for both HER and OER in a two-electrode configuration.

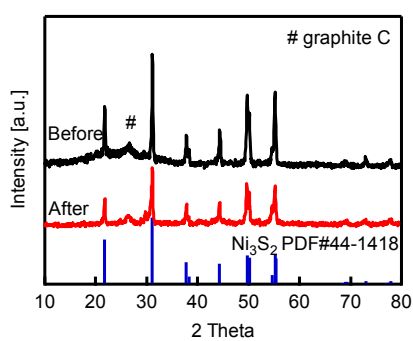

**Figure S10.** XRD patterns of NSF/CNT sample obtained before and after OER.

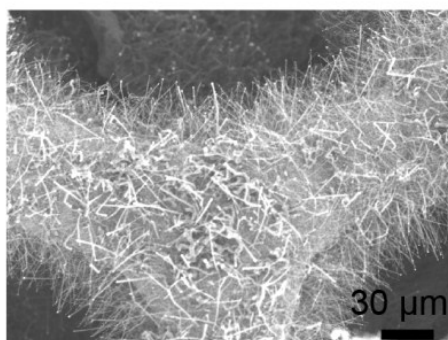

**Figure S11.** The SEM image of NSF/CNT sample after long-term OER.

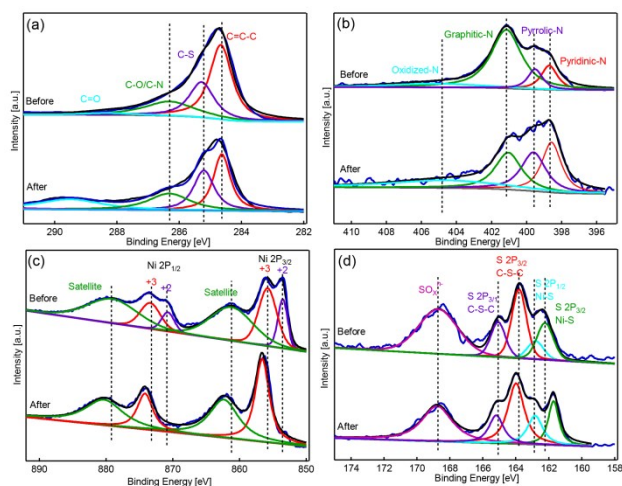

**Figure S12.** High resolution XPS (a) C 1s, (b) N 1s, (c) Ni 2p and (4) S 2p spectra for NSF/CNT catalysts before and after OER.

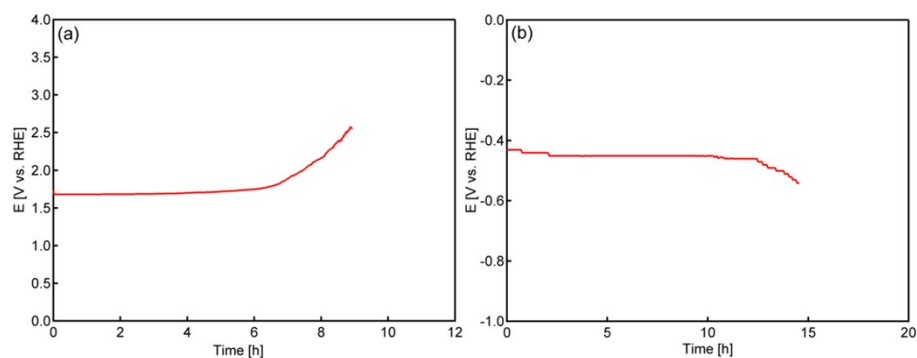

**Figure S13.** Long-term stability tests of the NSF as the working electrode for (a) OER and (b) HER at a current of 100 mA in  $N_2$  saturated 1 M KOH.

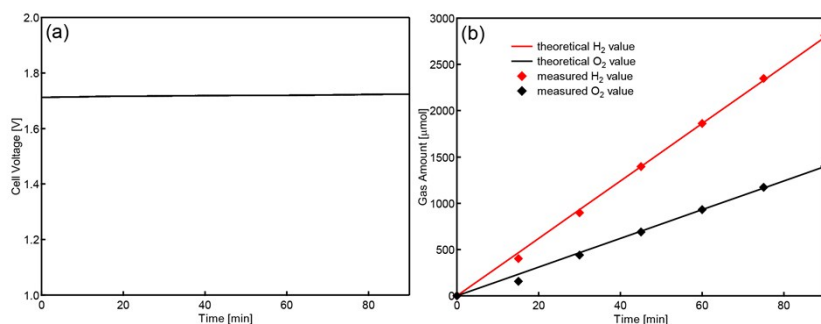

**Figure S14.** Performance of an overall water-splitting electrolyzer using NSF/CNT as electrocatalysts. (a) Chronopotential curve of water electrolysis using NSF/CNT as electrocatalyst for both HER and OER in a two-electrode configuration. (b) The time evolution of the amounts of theoretically calculated and experimentally determined oxygen ( $O_2$ ) and hydrogen ( $H_2$ ), which were produced during the water splitting process.



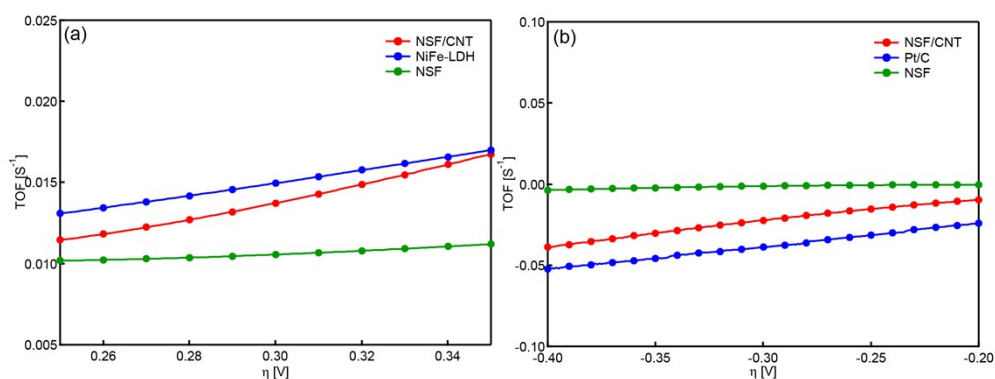

**Figure S15.** TOFs calculated at various potentials for (a) OER and (b) HER using different electrocatalysts.

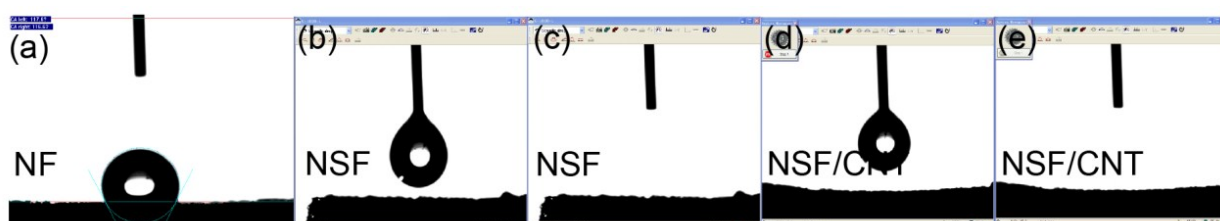

**Figure S16.** Hydrophilicity test of (a) Ni foam showing contact angle of  $117^\circ$ ; (b,c) NSF showing contact angle of  $\sim 0^\circ$ . (d,e) NSF/CNT showing contact angle of  $\sim 0^\circ$ .

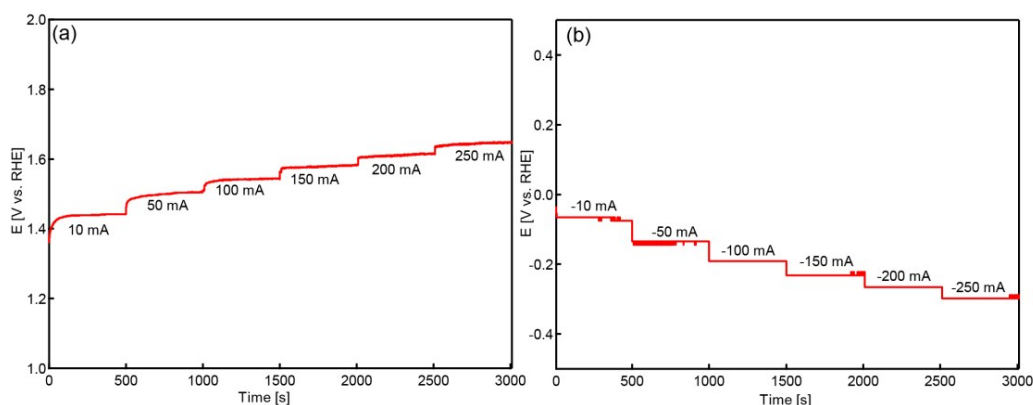

**Figure S17.** Multi-step current-time curves of NSF/CNT for (a) OER and (b) HER. The current density started at  $10 \text{ mA/cm}^2$  and ended at  $250 \text{ mA/cm}^2$ , with an increment of  $50 \text{ mA/cm}^2$  per  $500 \text{ s}$ .

**Table S1.** Comparison of the recently reported of highly active transition-metal-base bifunctional catalysts for both HER and OER in alkaline electrolyte. (Carbon Papers : CP ; Ni Foam : NF )

| Bifunctional catalysts                     | Electrolyte | Substrate | $\eta$ (mV) at $j$ ( $\text{mA cm}^{-2}$ ) |         | Cell voltage (V) at $j$ ( $\text{mA cm}^{-2}$ ) | Stability at $j$ ( $\text{mA cm}^{-2}$ ) | Ref |
|--------------------------------------------|-------------|-----------|--------------------------------------------|---------|-------------------------------------------------|------------------------------------------|-----|
|                                            |             |           | HER                                        | OER     |                                                 |                                          |     |
| $\text{MoS}_2/\text{Ni}_3\text{S}_2$       | 1.0 M KOH   | NF        | 110@10                                     | 218@10  | 1.56@10                                         | 10h@10                                   | 5   |
| $\text{Ni}_3\text{S}_2$                    | 1.0 M KOH   | CP        | 112@10                                     | 295@10  | 1.63@10                                         | 100h@10                                  | 6   |
| $\text{Ni}_3\text{S}_2$ nanosheet          | 1.0 M KOH   | NF        | 223@10                                     | 260@10  | 1.76@13                                         | 150h@10                                  | 7   |
| N- $\text{Ni}_3\text{S}_2$                 | 1.0 M KOH   | NF        | 110@10                                     | 330@100 | 1.66@50                                         | 8h@20                                    | 8   |
| $\text{Fe}_{11.1\%}\text{-Ni}_3\text{S}_2$ | 1.0 M KOH   | NF        | 203@50                                     | 234@50  | 1.66@20                                         | 42h@20                                   | 9   |

|                                                                         |           |    |                  |                   |                    |            |           |
|-------------------------------------------------------------------------|-----------|----|------------------|-------------------|--------------------|------------|-----------|
| Co <sub>9</sub> S <sub>8</sub> /Ni <sub>3</sub> S <sub>2</sub> nanowire | 1.0 M KOH | NF | 128@10           | 227@10            | 1.64@10            | 12h@10     | 10        |
| NCT-NiCo <sub>2</sub> S <sub>4</sub>                                    | 1.0 M KOH | NF | 295@100          | 330@100           | 1.6@10             | 15h@10     | 11        |
| FeS <sub>2</sub> /CoS <sub>2</sub>                                      | 1.0 M KOH | NF | 78.2@10          | 302@100           | 1.47@10            | 21h@15     | 12        |
| Ni-Fe-Co-S nanosheets                                                   | 1.0 M KOH | NF | 215@100          | 272@100           | 1.54@10            | 10h@50     | 13        |
| NiS <sub>2</sub> nanospheres                                            | 1.0 M KOH | CP | 147@10           | 241@10            | 1.66@10            | 120 cycles | 14        |
| MoS <sub>2</sub> /NiCoS nanosheets                                      | 1.0 M KOH | NF | 189@10           | 290@10            | 1.5@10             | 22h@10     | 15        |
| Ni(OH) <sub>2</sub> /Ni <sub>3</sub> S <sub>2</sub>                     | 1.0 M KOH | NF | 211@20           | 270@20            | 1.57@10            | 500cycles  | 16        |
| CuNiS NWs                                                               | 1.0 M KOH | CP | 71@10            | 307@30            | 1.54@10            | 25h@11     | 17        |
| Se-(NiCo)S/OH                                                           | 1.0 M KOH | NF | 103@10           | 155@10            | 1.6@10             | 66h@10     | 18        |
| N-C/NiS <sub>2</sub>                                                    | 1.0 M KOH | CP | 78@10            | 264@10            | 1.63@30            | 48h@30     | 19        |
| NSF/CNT                                                                 | 1.0 M KOH | NF | 64@10<br>266@200 | 208@10<br>380@200 | 1.5@10<br>1.72@100 | 50h@100    | This work |

### Reference for the SI:

- 1 Liu, J.; Wang, J.; Zhang, B.; Ruan, Y.; Lv, L.; Ji, X.; Jiang, J., Hierarchical NiCo<sub>2</sub>S<sub>4</sub>@ NiFe LDH heterostructures supported on nickel foam for enhanced overall-water-splitting activity. *ACS applied materials & interfaces* **2017**, *9* (18), 15364-15372.
- 2 Xu, W.; Lu, Z.; Sun, X.; Jiang, L.; Duan, X., Superwetting electrodes for gas-involving electrocatalysis. *Accounts of chemical research* **2018**, *51* (7), 1590-1598.
- 3 Wang, S.; Liu, K.; Yao, X.; Jiang, L., Bioinspired surfaces with superwettability: new insight on theory, design, and applications. *Chem. Rev.* **2015**, *115*, 8230-8293.
- 4 Derjaguin, B. V.; Muller, V. M.; Toporov, Y. P., Effect of contact deformations on the adhesion of particles. *J. Colloid Interface Sci.* **1975**, *53*, 314-326.
- 5 Zhang, J.; Wang, T.; Pohl, D.; Rellinghaus, B.; Dong, R.; Liu, S.; Feng, X., Interface engineering of MoS<sub>2</sub>/Ni<sub>3</sub>S<sub>2</sub> heterostructures for highly enhanced electrochemical overall-water-splitting activity. *Angewandte Chemie International Edition* **2016**, *55* (23), 6702-6707.

- 6 Zheng, X.; Han, X.; Zhang, Y.; Wang, J.; Zhong, C.; Deng, Y.; Hu, W., Controllable synthesis of nickel sulfide nanocatalysts and their phase-dependent performance for overall water splitting. *Nanoscale* **2019**, *11* (12), 5646-5654.
- 7 Feng, L. L.; Yu, G.; Wu, Y.; Li, G. D.; Li, H.; Sun, Y.; Zou, X., High-index faceted Ni<sub>3</sub>S<sub>2</sub> nanosheet arrays as highly active and ultrastable electrocatalysts for water splitting. *Journal of the American Chemical Society* **2015**, *137* (44), 14023-14026.
- 8 Chen, P.; Zhou, T.; Zhang, M.; Tong, Y.; Zhong, C.; Zhang, N.; Xie, Y., 3D Nitrogen-Anion-Decorated Nickel Sulfides for Highly Efficient Overall Water Splitting. *Advanced Materials* **2017**, *29* (30), 1701584.
- 9 Zhu, W.; Yue, Z.; Zhang, W.; Hu, N.; Luo, Z.; Ren, M.; Wang, J., Wet-chemistry topotactic synthesis of bimetallic iron–nickel sulfide nanoarrays: an advanced and versatile catalyst for energy efficient overall water and urea electrolysis. *Journal of Materials Chemistry A* **2018**, *6* (10), 4346-4353.
- 10 Du, F.; Shi, L.; Zhang, Y.; Li, T.; Wang, J.; Wen, G.; Zou, Z., Foam–like Co<sub>9</sub>S<sub>8</sub>/Ni<sub>3</sub>S<sub>2</sub> heterostructure nanowire arrays for efficient bifunctional overall water–splitting. *Applied Catalysis B: Environmental* **2019**, *253*, 246-252.
- 11 Li, F.; Xu, R.; Li, Y.; Liang, F.; Zhang, D.; Fu, W. F.; Lv, X. J., N-doped carbon coated NiCo<sub>2</sub>S<sub>4</sub> hollow nanotube as bifunctional electrocatalyst for overall water splitting. *Carbon* **2019**, *145*, 521-528.
- 12 Li, Y.; Yin, J.; An, L.; Lu, M.; Sun, K.; Zhao, Y. Q.; Xi, P., FeS<sub>2</sub>/CoS<sub>2</sub> interface nanosheets as efficient bifunctional electrocatalyst for overall water splitting. *Small* **2018**, *14* (26), 1801070.
- 13 Darband, G. B.; Aliofkhazraei, M.; Hyun, S.; Rouhaghdam, A. S.; Shanmugam, S., Electrodeposition of Ni–Co–Fe mixed sulfide ultrathin nanosheets on Ni nanocones: a low-cost, durable and high performance catalyst for electrochemical water splitting. *Nanoscale* **2019**, *11* (35), 16621-16634.

- 14 Shi, X.; Ling, X.; Li, L.; Zhong, C.; Deng, Y.; Han, X.; Hu, W., Nanosheets assembled into nickel sulfide nanospheres with enriched Ni<sup>3+</sup> active sites for efficient water-splitting and zinc–air batteries. *Journal of Materials Chemistry A* **2019**, 7 (41), 23787-23793.
- 15 Qin, C.; Fan, A.; Zhang, X.; Wang, S.; Yuan, X.; Dai, X., Interface engineering: few-layer MoS<sub>2</sub> coupled to a NiCo-sulfide nanosheet heterostructure as a bifunctional electrocatalyst for overall water splitting. *Journal of Materials Chemistry A* **2019**, 7(48), 27594-27602.
- 16 Du, X.; Yang, Z.; Li, Y.; Gong, Y.; Zhao, M., Controlled synthesis of Ni(OH)<sub>2</sub>/Ni<sub>3</sub>S<sub>2</sub> hybrid nanosheet arrays as highly active and stable electrocatalysts for water splitting. *Journal of Materials Chemistry A* **2018**, 6(16), 6938-6946.
- 17 Cao, D.; Cheng, D., One-pot synthesis of copper–nickel sulfide nanowires for overall water splitting in alkaline media. *Chemical Communications* **2019**, 55 (56): 8154-8157.
- 18 Hu, C.; Zhang, L.; Zhao, Z. J.; Li, A.; Chang, X.; Gong, J., Synergism of geometric construction and electronic regulation: 3D Se-(NiCo)S<sub>x</sub>/(OH)<sub>x</sub> nanosheets for highly efficient overall water splitting. *Advanced Materials* **2018**, 30 (12), 1705538.
- 19 Zhang, D.; Mou, H.; Chen, L.; Xing, G.; Wang, D.; Song, C., Surface/interface engineering N-doped carbon/NiS<sub>2</sub> nanosheets for efficiently electrocatalytic H<sub>2</sub>O splitting. *Nanoscale* **2020**.
